# Supplementary material
Source: ML conference proceedings conference paper supplement (https://proceedings.neurips.cc/paper_files/paper/2022/hash/958b631012454391121f96fdc719d034-Abstract.html)
Supplement: Supplementary file 1 [file 958b631012454391121f96fdc719d034-Supplemental-Conference.pdf]

---

# Supplement to : ‘On Translation and Reconstruction Guarantees of the Cycle-Consistent Generative Adversarial Networks’

---

**Anish Chakrabarty**  
Statistics and Mathematics Unit  
Indian Statistical Institute, Kolkata  
West Bengal, India

**Swagatam Das**  
Electronics and Communication Sciences Unit  
Indian Statistical Institute, Kolkata  
West Bengal, India

## Appendix

**Proof of Lemma (2).** Let us begin by specifying the class of discriminators  $\mathcal{L}_X \equiv \mathcal{L}_c^1$ . Now, given  $\alpha, \beta \in \mathcal{P}(\mathcal{Y})$

$$d_{\mathcal{L}_X}(\phi_{\#}\alpha, \phi_{\#}\beta) = \sup_{l \in \mathcal{L}_X} [\mathbb{E}_{\phi_{\#}\alpha} l - \mathbb{E}_{\phi_{\#}\beta} l] = \sup_{l \in \mathcal{L}_X} [\mathbb{E}_{\alpha}(l \circ \phi) - \mathbb{E}_{\beta}(l \circ \phi)].$$

Due to the definition of supremum, for any  $\epsilon > 0 \exists l_{\epsilon} \in \mathcal{L}_X$  for which

$$\begin{aligned} d_{\mathcal{L}_X}(\phi_{\#}\alpha, \phi_{\#}\beta) &\leq \mathbb{E}_{\alpha}(l_{\epsilon} \circ \phi) - \mathbb{E}_{\beta}(l_{\epsilon} \circ \phi) + \epsilon \\ &= \inf_{g \in l_{\epsilon} \circ G_{Lip}} \left\{ \mathbb{E}_{\alpha} |l_{\epsilon} \circ \phi - g| - \mathbb{E}_{\beta} |l_{\epsilon} \circ \phi - g| + \mathbb{E}_{\alpha}(g) - \mathbb{E}_{\beta}(g) \right\} + \epsilon \\ &\leq 2 \inf_{g' \in G_{Lip}} \left\| \phi - g' \right\|_{\infty} + \left\{ \sup_{l \in \mathcal{L}_X} [\mathbb{E}_{\alpha}(l \circ g^*) - \mathbb{E}_{\beta}(l \circ g^*)] \right\} + \epsilon, \forall g^* \in G_{Lip}. \end{aligned}$$

Here,  $l_{\epsilon} \circ G_{Lip} := \{l_{\epsilon} \circ f : f \in G_{Lip}\}$ . Now,

$$\begin{aligned} \sup_{l \in \mathcal{L}_X} [\mathbb{E}_{\alpha}(l \circ g^*) - \mathbb{E}_{\beta}(l \circ g^*)] &= \inf_{\gamma \in \Gamma(\alpha, \beta)} \int c(g^*(x), g^*(y)) d\gamma(x, y) \\ &\leq L_G \inf_{\gamma \in \Gamma(\alpha, \beta)} \int c'(x, y) d\gamma(x, y), \end{aligned} \tag{1}$$

where (1) is due to the fact that  $g^* \in G_{Lip}$ . As such,

$$d_{\mathcal{L}_c^1}(\phi_{\#}\alpha, \phi_{\#}\beta) \leq 2 \inf_{g' \in G_{Lip}} \left\| \phi - g' \right\|_{\infty} + L_G d_{\mathcal{L}_c^1}(\alpha, \beta).$$

□

**Proof of Corollary (1).** We have already noticed  $\mathbb{E}_{\nu}[d_{\mathcal{L}_c^1}(\nu, \hat{\nu}_{n_2})] \leq \mathcal{O}((k^2 n_2)^{-\frac{1}{k}})$ ,  $k \geq 2$ . Since the distance  $d_{\mathcal{L}_c^1}(\cdot, \cdot)$  satisfies the bounded difference inequality, the application of McDiarmid’s inequality leads to

$$\mathbb{P}\left(d_{\mathcal{L}_c^1}(\nu, \hat{\nu}_{n_2}) \leq \mathcal{O}((k^2 n_2)^{-\frac{1}{k}}) + t\right) \geq 1 - \exp\left\{-\frac{2n_2 t^2}{B_y^2}\right\}, \tag{2}$$

where  $B_y = \text{diam}(\Omega_y)$  with respect to the metric  $c'$ . We point out that (2) is a generalized version of Proposition 20 in [1]. Now, Theorem (1) tells us,

$$d_{\mathcal{L}_c^1}(\hat{\mu}_{n_1}, \phi_{\#}\hat{\nu}_{n_2}) \leq \epsilon + L_G d_{\mathcal{L}_c^1}(\nu, \hat{\nu}_{n_2}) + \mathcal{O}(C_1 W^{-\frac{2}{k}} L^{-\frac{2}{k}}),$$

given  $\epsilon > 0$  and  $n_1 \leq \frac{W-d-1}{2} \lfloor \frac{W-d-1}{6d} \rfloor \lfloor \frac{L}{2} \rfloor + 2$ . Combining these two results, we get

$$\mathbb{P}\left(d_{\mathcal{L}_c^1}(\hat{\mu}_{n_1}, \phi_{\#}\hat{\nu}_{n_2}) \leq \mathcal{O}((k^2 n_2)^{-\frac{1}{k}}) + \frac{(1+L_G)B_y}{\sqrt{2}} n_2^{-\frac{1}{2}} \sqrt{\ln\left(\frac{1}{\delta}\right)} + \mathcal{O}(C_1 W^{-\frac{2}{k}} L^{-\frac{2}{k}})\right) \geq 1-\delta,$$

by taking  $\delta = \exp\left\{-\frac{2n_2 t^2}{B_y^2}\right\}$ . The statement also holds if we replace the two sample sizes  $n_1, n_2$  with  $\min(n_1, n_2)$ . In such a case, the Borel-Cantelli lemma implies that  $d_{\mathcal{L}_c^1}(\hat{\mu}_{n_1}, \phi_{\#}\hat{\nu}_{n_2}) \rightarrow 0$  almost surely (under  $\mathbb{P}$ ), provided  $d, k$  remain fixed.  $\square$

**Remark.** We draw the attention of the reader to a particular consequence of this result. Observe that the width ( $W$ ) and depth ( $L$ ) of the translator network are intrinsically related to the sample size ( $n_1$ ) from the target law. In case  $\min(n_1, n_2) \rightarrow \infty$ ,  $W$  also follows suit, given that  $L$  remains constant. As such, our ideal backward translator, achieving generation consistency, is a finite sample approximation of an infinitely wide ReLU network. Maps induced by such an infinitely wide network converge in distribution to a Gaussian process [2]. This determines the large sample property of  $\phi$ . Finding out the exact statistical properties of such a process in a parametric setup might be taken up as future work.

**Remark.** For any  $n_1 \in \mathbb{N}^+$ ,  $d_{\mathcal{L}_c^1}(\mu, \phi_{\#}\hat{\nu}_{n_2}) \leq d_{\mathcal{L}_c^1}(\mu, \hat{\mu}_{n_1}) + d_{\mathcal{L}_c^1}(\hat{\mu}_{n_1}, \phi_{\#}\hat{\nu}_{n_2})$ . We have already seen that the second term on the right-hand side of the inequality vanishes eventually [Corollary 1]. Moreover, similar to (2)

$$\mathbb{P}\left(d_{\mathcal{L}_c^1}(\mu, \hat{\mu}_{n_1}) \leq \mathcal{O}((d^2 n_1)^{-\frac{1}{d}}) + t\right) \geq 1 - \exp\left\{-\frac{2n_1 t^2}{B_x^2}\right\}.$$

As a result,  $d_{\mathcal{L}_c^1}(\mu, \hat{\mu}_{n_1}) \xrightarrow{a.s.} 0$  (using Borel-Cantelli lemma). Hence, it can be concluded that  $\phi_{\#}\hat{\nu}_{n_2}$  converges weakly to  $\mu$  in  $\mathcal{P}(\mathcal{X})$  [Theorem 6.9 in [3]].

**Proof of Theorem (2).** Let us carry out the decomposition of the realized backward translation error, similar to that in Theorem (1).

$$d_{\mathcal{W}_1^{m,\infty}}(\hat{\mu}_{n_1}, \phi_{\#}\hat{\nu}_{n_2}) \leq d_{\mathcal{W}_1^{m,\infty}}(\hat{\mu}_{n_1}, \phi_{\#}\nu) + d_{\mathcal{W}_1^{m,\infty}}(\phi_{\#}\nu, \phi_{\#}\hat{\nu}_{n_2}).$$

Observe that  $\mathcal{W}_1^{m,\infty} \subset \mathcal{W}_1^{1,\infty}$ , for any positive integer  $m$ . Also, the class  $\mathcal{W}_1^{1,\infty}$  is a dense subset of 1-Lipschitz functions on  $\mathcal{X}$ . As such,  $d_{\mathcal{W}_1^{m,\infty}}(\hat{\mu}_{n_1}, \phi_{\#}\nu) \leq d_{\mathcal{L}_c^1}(\hat{\mu}_{n_1}, \phi_{\#}\nu) \leq \epsilon$ , where  $\epsilon > 0$  (as in the proof of Theorem (1)).

The remaining approximation error can similarly be upper bound using the same technique. However, it would be far from tight. Let us define a class of functions that help in the pursuit of sharper bounds.

**Definition (Hölder Space).** For  $s \in \mathbb{R}_{>0}$ , with  $\lfloor s \rfloor$  indicating the largest integer strictly smaller than  $s$ , the Hölder space of order  $s$  is defined as

$$\mathcal{C}_L^s(\mathbb{R}^d) = \left\{f \in C_u(\mathbb{R}^d) : \|f\|_{\mathcal{C}^s} \equiv \|f\|_{\mathcal{W}^{\lfloor s \rfloor}} + \sum_{|\alpha|=\lfloor s \rfloor} \sup_{\substack{x \neq y \\ x, y \in \mathbb{R}^d}} \frac{|D^\alpha f(x) - D^\alpha f(y)|}{|x - y|^{s-\lfloor s \rfloor}} < L\right\}.$$

Now, similar to the proof of Lemma (2), for any  $\epsilon' > 0 \exists l_{\epsilon'} \in \mathcal{W}_1^{m,\infty}$  such that

$$\begin{aligned} d_{\mathcal{W}_1^{m,\infty}}(\phi_{\#}\alpha, \phi_{\#}\beta) &\leq \mathbb{E}_\alpha(l_{\epsilon'} \circ \phi) - \mathbb{E}_\beta(l_{\epsilon'} \circ \phi) + \epsilon', \quad \text{where } \alpha, \beta \in \mathcal{P}(\mathcal{Y}) \\ &= \inf_{g \in l_{\epsilon'} \circ G_{Lip}} \left\{ \mathbb{E}_\alpha(l_{\epsilon'} \circ \phi) - g - \mathbb{E}_\beta(l_{\epsilon'} \circ \phi) - g + \mathbb{E}_\alpha(g) - \mathbb{E}_\beta(g) \right\} + \epsilon' \\ &\leq 2 \inf_{g' \in G_{Lip}} \left\| \phi - g' \right\|_\infty + \left\{ \sup_{l \in \mathcal{W}_1^{m,\infty}} [\mathbb{E}_\alpha(l \circ g^*) - \mathbb{E}_\beta(l \circ g^*)] \right\} + \epsilon', \quad \forall g^* \in G_{Lip}. \end{aligned} \tag{3}$$

The first term in (3) is obtained due to the Lipschitz property of  $l_{\epsilon'}$ . Here,

$$\sup_{l \in \mathcal{W}_1^{m,\infty}} [\mathbb{E}_\alpha(l \circ g^*) - \mathbb{E}_\beta(l \circ g^*)] = d_{\mathcal{W}_1^{m,\infty}}(g_\#^* \alpha, g_\#^* \beta) \leq d_{\mathcal{C}_r^m}(g_\#^* \alpha, g_\#^* \beta) \tag{4}$$

$$= \sup_{l \in \mathcal{C}_r^m \circ g^*} \left\{ \mathbb{E}_{x \sim \alpha}[l(x)] - \mathbb{E}_{x \sim \beta}[l(x)] \right\}. \tag{5}$$

Inequality (4) is based on the observation that there exists  $r > 0$  for which  $\mathcal{W}_1^{m,\infty} \subset \mathcal{C}_r^m$  [4]. Given any  $f \in \mathcal{C}_r^m$  and  $g^* \in G_{Lip}$ ,

$$\begin{aligned} \|f \circ g^*\|_\infty &= \left\{ \sup |f(g^*(y))| : y \in \mathbb{R}^k \right\} = \left\{ \sup |f(x)| : x = g^*(y) \in \mathbb{R}^d, y \in \mathbb{R}^k \right\} \\ &\leq \left\{ \sup |f(x)| : x \in \mathbb{R}^d \right\} = \|f\|_\infty. \end{aligned}$$

Moreover, for  $x, y \in \mathbb{R}^k, x \neq y$

$$\begin{aligned} \frac{|D^\alpha f(g^*(x)) - D^\alpha f(g^*(y))|}{|x - y|^{s-\lfloor s \rfloor}} &= \frac{|D^\alpha f(g^*(x)) - D^\alpha f(g^*(y))|}{|g^*(x) - g^*(y)|^{s-\lfloor s \rfloor}} \left\{ \frac{|g^*(x) - g^*(y)|}{|x - y|} \right\}^{s-\lfloor s \rfloor} \\ &\leq \frac{|D^\alpha f(x^*) - D^\alpha f(y^*)|}{|x^* - y^*|^{s-\lfloor s \rfloor}} (L_G)^{s-\lfloor s \rfloor}, \end{aligned}$$

assuming  $x^* \neq y^* \in \mathbb{R}^d$ . Here, we choose both the metrics  $c, c'$  to be  $L^1$  in their respective spaces. This convention conforms to the rest of the discussion as well.

Also, for  $1 \leq |s| \leq m$  we have

$$D^s(f \circ g^*)(x) = s! \sum_{1 \leq |i| \leq |s|} \frac{(D^i f)(g^*(x))}{i!} P_{s,i}(g^*; x),$$

where  $P_{s,i}(g^*; x)$  is a homogeneous polynomial of degree  $|i|$ . Schreuder *et al.* [Lemma 7.2 in [5]] show that  $|D^s(f \circ g^*)(x)| < C$ , where  $C > 0$  is a constant. This implies that there exists  $r^* > 0$  for which  $f \circ g^* \in \mathcal{C}_{r^*}^m(\mathbb{R}^k)$ . As such, we may upper bound (5) by replacing the supremum over  $\mathcal{C}_r^m(\mathbb{R}^d) \circ g^*$  by the same over  $\mathcal{C}_{r^*}^m(\mathbb{R}^k)$ .

Hence, for  $\epsilon > 0$

$$d_{\mathcal{W}_1^{m,\infty}}(\hat{\mu}_{n_1}, \phi_{\#} \hat{\nu}_{n_2}) \leq 2 \inf_{g' \in G_{Lip}} \left\| \phi - g' \right\|_\infty + d_{\mathcal{C}_{r^*}^m}(\nu, \hat{\nu}_{n_2}) + \epsilon.$$

The expected approximation error in the base domain can be put under a deterministic upper bound given by  $\mathbb{E}_\nu [d_{\mathcal{C}_{r^*}^m}(\nu, \hat{\nu}_{n_2})] \lesssim n_2^{-\frac{m}{k}} + \frac{\log n_2}{\sqrt{n_2}}$  [Lemma 2.8 in [6]]. As such, we get  $\mathbb{E}[d_{\mathcal{W}_1^{m,\infty}}(\hat{\mu}_{n_1}, \phi_{\#} \hat{\nu}_{n_2})] \leq \mathcal{O}(n_2^{-\frac{m}{k}} + \frac{\log n_2}{\sqrt{n_2}}) + \mathcal{O}(\sqrt{k} L_G B_y W^{-\frac{2}{k}} L^{-\frac{2}{k}})$ .  $\square$

**Proof of Proposition (1).** Let us denote the VC dimension of  $\mathcal{Y}(\mathcal{P}(\mathcal{X}))$  by  $v_x < \infty$ . This criteria ensures that the target class of distributions are ‘learnable’. For example,  $\text{VC-dim}[\mathcal{Y}(\mathcal{G}_d)] = \mathcal{O}(d^2)$ , where  $\mathcal{G}_d$  is the class of  $d$ -dimensional Gaussian distributions [7]. Now, given  $g \in G_{Lip}$ , for any  $n \in \mathbb{N}^+$

$$\begin{aligned} d_{\mathcal{L}_c^1}(g_{\#} \hat{\nu}_n, \widehat{(g_{\#} \nu)}_n) &\leq d_{\mathcal{L}_c^1}(g_{\#} \hat{\nu}_n, g_{\#} \nu) + d_{\mathcal{L}_c^1}(g_{\#} \nu, \widehat{(g_{\#} \nu)}_n) \\ &\leq L_G d_{\mathcal{L}_c^1}(\hat{\nu}_n, \nu) + B_x \left\| g_{\#} \nu - \widehat{(g_{\#} \nu)}_n \right\|_{TV}. \end{aligned} \quad (6)$$

Inequality (6) exploits the relation between Wasserstein and TV metrics [Theorem 4 in [8]]. We know there exists constants  $\tilde{C}_1, \tilde{C}_2 > 0$  such that

$$\mathbb{P}\left(\left\| g_{\#} \nu - \widehat{(g_{\#} \nu)}_n \right\|_{TV} \geq \tilde{C}_1 \sqrt{\frac{v_x}{n}} + t\right) \leq \exp(-\tilde{C}_2 n t^2),$$

[Lemma 2 in [9]]. Using this argument along with (2) we obtain

$$\mathbb{P}\left(d_{\mathcal{L}_c^1}(g_{\#} \hat{\nu}_n, \widehat{(g_{\#} \nu)}_n) \leq t + \mathcal{O}(n^{-\frac{1}{k}}) + \mathcal{O}(\sqrt{v_x} n^{-\frac{1}{2}})\right) \geq 1 - 2 \exp(-C_2 n t^2),$$

where  $C_2 = \frac{1}{4} \min\left\{\frac{2}{(B_y L_G)^2}, \frac{\tilde{C}_2}{B_x^2}\right\} > 0$ . As such, the function  $g$  is an information preserving map of degree 1, under the 1-Wasserstein metric, with a decaying error of order  $\mathcal{O}(n^{-\frac{1}{k\vee 2}})$ .  $\square$

**Proof of Lemma (4).** Our characterization of the critics allow  $\mathcal{L}_X$  to be  $\mathcal{L}_c^1$  or  $\mathcal{W}_1^{m,\infty}$ . Under this setup, for any backward translator  $G$

$$\begin{aligned} d_{\mathcal{L}_X}(\hat{\mu}_{n_1}, G_{\#}\hat{\nu}_{n_2}) &\leq d_{\mathcal{L}_X}(\hat{\mu}_{n_1}, \widehat{(G_{\#}\nu)}_{n_2}) + d_{\mathcal{L}_X}(\widehat{(G_{\#}\nu)}_{n_2}, G_{\#}\hat{\nu}_{n_2}) \\ &\leq B_x \left\| \hat{\mu}_{n_1} - \widehat{(G_{\#}\nu)}_{n_2} \right\|_{TV} + \mathcal{E}_3 \\ &\leq B_x \left\| \hat{\mu}_{n_1} - \Gamma_{n_1} \right\|_{TV} + \Lambda_{(n_1, n_2)} + \mathcal{E}_3, \end{aligned} \quad (7)$$

where  $\Gamma_{n_1} = \operatorname{argmin}_{\tau \in \mathcal{P}(\mathcal{X})} \|\tau - \hat{\mu}_{n_1}\|_{TV}$ . It is often called the *Empirical Yatracos Minimizer* [10]. Observe that,  $\|\hat{\mu}_{n_1} - \Gamma_{n_1}\|_{TV} \leq \|\hat{\mu}_{n_1} - \mu\|_{TV}$ . Now, in case the OT map  $T$  exists such that  $T_{\#}\nu = \mu$ , we get  $\|\hat{\mu}_{n_1} - \Gamma_{n_1}\|_{TV} \leq \mathcal{E}_1$ .  $\square$

**Remark.** The information loss (in the right-hand side of (7)) can be taken care of by deploying an IPT as the translator. As such, it is the term  $d_{\mathcal{L}_X}(\hat{\mu}_{n_1}, \widehat{(G_{\#}\nu)}_{n_2})$  that mainly contributes to the upper bound. We had built the empirical distribution  $\hat{\mu}_{n_1}$  based on  $\{X_i\}_{i=1}^{n_1} \stackrel{i.i.d.}{\sim} \mu$ . Similarly, let  $\widehat{(G_{\#}\nu)}_{n_2}$  be based on  $\{Y_i\}_{i=1}^{n_2} \stackrel{i.i.d.}{\sim} G_{\#}\nu$ . We may write

$$d_{\mathcal{L}_X}(\hat{\mu}_{n_1}, \widehat{(G_{\#}\nu)}_{n_2}) = \sup_{f \in \mathcal{L}_X} \left| \sum_{i=1}^N W_i f(Z_i) \right|, \quad (8)$$

where  $N = n_1 + n_2$ ;  $W_i = \frac{1}{n_1}$  when  $Z_i = X_i$ ,  $i = 1, \dots, n_1$  and  $W_{n_1+j} = -\frac{1}{n_2}$  when  $Z_{n_1+j} = Y_j$ ,  $j = 1, \dots, n_2$ . Under this framework, the solution to (8) can be achieved by solving a linear program, given that  $\mathcal{L}_X \equiv \mathcal{L}_c^1$  [Theorem 2.1 in [11]]. This provides a pathway to get hold of the realized approximation error, making the upper bound deterministic.

**Proof of Lemma (5).** Given translator maps  $G \in \mathcal{F}(\mathcal{Y}, \mathcal{P}(\mathcal{X}))$  and  $F \in \mathcal{F}(\mathcal{X}, \mathcal{P}(\mathcal{Y}))$ , the cyclic loss in the space  $\mathcal{X}$  can be broken down as the following:

$$\|\mu - (G \circ F)_{\#}\mu\|_1 \leq \|\mu - G_{\#}\nu\|_1 + \|G_{\#}\nu - (G \circ F)_{\#}\mu\|_1,$$

where

$$\begin{aligned} \|G_{\#}\nu - (G \circ F)_{\#}\mu\|_1 &= \|G_{\#}\nu - G_{\#}(F_{\#}\mu)\|_1 = 2 \sup_{\omega \subseteq \sigma(\mathcal{X})} |G_{\#}\nu(\omega) - G_{\#}(F_{\#}\mu)(\omega)| \\ &= 2 \sup_{\omega \subseteq \sigma(\mathcal{X})} |\nu(G^{-1}(\omega)) - F_{\#}\mu(G^{-1}(\omega))| \\ &\leq 2 \sup_{\omega' \subseteq \sigma(\mathcal{Y})} |\nu(\omega') - F_{\#}\mu(\omega')| = \|\nu - F_{\#}\mu\|_1. \end{aligned}$$

The inequality holds by taking supremum over all measurable sets belonging to the Borel  $\sigma$ -algebra on  $\mathcal{Y}$  instead of the particular path directed by  $G^{-1}$ . As such

$$\|\mu - (G \circ F)_{\#}\mu\|_1 \leq \|\mu - G_{\#}\nu\|_1 + \|\nu - F_{\#}\mu\|_1.$$

Similarly,  $\|\nu - (F \circ G)_{\#}\nu\|_1 \leq \|\nu - F_{\#}\mu\|_1 + \|\mu - G_{\#}\nu\|_1$ . Hence the proof.  $\square$

**Proof of Theorem (3).** Given a measurable function  $f : \mathbb{R}^d \rightarrow \mathbb{R}$ , let us define its *convolution* with the kernel  $K : \mathbb{R}^d \times \mathbb{R}^d \rightarrow \mathbb{R}$  as the following:

$$K_h(f) = \int_{\mathbb{R}^d} K_h(\cdot, y) f(y) dy = \frac{1}{h^d} \int_{\mathbb{R}^d} K\left(\frac{\cdot}{h}, \frac{y}{h}\right) f(y) dy,$$

where  $\frac{y}{h} = (\frac{y_1}{h}, \dots, \frac{y_d}{h})'$ ,  $h > 0$ . We begin by taking  $K$  to be regularly invariant. Now,

$$\begin{aligned} \|p_{\mu} - p_{\phi_{\#}\nu}\|_1 &\leq \|p_{\mu} - K_h(p_{\mu})\|_1 + \|K_h(p_{\mu}) - K_h(p_{\phi_{\#}\nu})\|_1 + \|K_h(p_{\phi_{\#}\nu}) - p_{\phi_{\#}\nu}\|_1 \\ &\leq J \|p_{\mu} - K_h(p_{\mu})\|_p + \|K_h(p_{\mu}) - K_h(p_{\phi_{\#}\nu})\|_1 + J \|K_h(p_{\phi_{\#}\nu}) - p_{\phi_{\#}\nu}\|_p, \end{aligned} \quad (9)$$

where  $J > 0$ . The existence of such a constant, and hence the inequality (9), is ensured by the fact  $\|f\|_1 \leq J\|f\|_p$ ,  $p \geq 1$  since we have  $\lambda(\Omega_x) < \infty$ . Also, there exists a constant  $l$  depending upon  $m_x$  and  $K$ , such that  $\|K_h(p_\mu) - p_\mu\|_p \leq l\|D^{m_x} p_\mu\|_p h^{m_x}$  [Proposition 4.3.33 in [12]]. As such, we get hold of a constant  $J^* = Jl$  for which

$$\|p_\mu - p_{\phi_\# \nu}\|_1 \leq J^* \left\{ \|D^{m_x} p_\mu\|_p + \|D^{m_x} p_{\phi_\# \nu}\|_{p'} \right\} h^{m_x} + \|K_h(p_\mu) - K_h(p_{\phi_\# \nu})\|_1$$

(by Assumption 2). Observe that,

$$K_h(p_\mu)(x) - K_h(p_{\phi_\# \nu})(x) = \frac{1}{h^d} \int \left\{ K\left(\frac{x}{h}, \frac{y}{h}\right) - K\left(\frac{x}{h}, \frac{z}{h}\right) \right\} d\kappa(y, z),$$

where  $\kappa$  is a coupling between  $\mu$  and  $\phi_\# \nu$ . Hence,

$$\|K_h(p_\mu) - K_h(p_{\phi_\# \nu})\|_1 \leq \int \left\{ \frac{1}{h^d} \int \left| K\left(\frac{x}{h}, \frac{y}{h}\right) - K\left(\frac{x}{h}, \frac{z}{h}\right) \right| dx \right\} d\kappa(y, z) \quad (10)$$

$$\begin{aligned} &= \int \left\{ \frac{\int \left| K\left(x', \frac{y}{h}\right) - K\left(x', \frac{z}{h}\right) \right| dx'}{|y - z|} \right\} |y - z| d\kappa(y, z) \\ &\leq \frac{M^*}{h} \int |y - z| d\kappa(y, z), \end{aligned} \quad (11)$$

where  $M^*$  is a positive constant. The step (10) is due to Jensen's inequality, whereas (11) exploits the invariance of  $K$ . Since the inequality holds for all possible measure couples  $\kappa$ , we conclude

$$\|K_h(p_\mu) - K_h(p_{\phi_\# \nu})\|_1 \leq \frac{M^*}{h} W_c^1(\mu, \phi_\# \nu),$$

given that  $c \equiv L^1$ . A similar inference can be drawn for a general class of metrics  $c$  by altering the specification of the same in the definition of invariance. Now, choose

$$h = \left\{ \frac{W_c^1(\mu, \phi_\# \nu)}{\|D^{m_x} p_\mu\|_p + \|D^{m_x} p_{\phi_\# \nu}\|_{p'}} \right\}^{\frac{1}{m_x+1}}.$$

Finally, we obtain

$$\|p_\mu - p_{\phi_\# \nu}\|_1 \leq M \left[ \|D^{m_x} p_\mu\|_p + \|D^{m_x} p_{\phi_\# \nu}\|_{p'} \right]^{\frac{1}{m_x+1}} [W_c^1(\mu, \phi_\# \nu)]^{\frac{m_x}{m_x+1}},$$

where  $M = 2(J^* \vee M^*)$ . □

**Proof of Proposition (2).** Using Lemma (5),

$$\begin{aligned} \mathcal{L}_{cyc}(\hat{\mu}_{n_1}, \hat{\nu}_{n_2}, F, G) &= \|\hat{\mu}_{n_1} - (G \circ F)_\# \hat{\mu}_{n_1}\|_1 + \|\hat{\nu}_{n_2} - (F \circ G)_\# \hat{\nu}_{n_2}\|_1 \\ &\leq 4 \{ \|\hat{\mu}_{n_1} - G_\# \hat{\nu}_{n_2}\|_{TV} + \|\hat{\nu}_{n_2} - F_\# \hat{\mu}_{n_1}\|_{TV} \}. \end{aligned}$$

Now, a similar decomposition of the translation errors under the TV metric, as in the proof of Lemma (4), results in the following:

$$\begin{aligned} \|\hat{\mu}_{n_1} - G_\# \hat{\nu}_{n_2}\|_{TV} &\leq \|\hat{\mu}_{n_1} - \Gamma_{n_1}\|_{TV} + \|\Gamma_{n_1} - (\widehat{G_\# \nu})_{n_2}\|_{TV} + \|(\widehat{G_\# \nu})_{n_2} - G_\# \hat{\nu}_{n_2}\|_{TV} \\ &\leq \|\hat{\mu}_{n_1} - \mu\|_{TV} + \frac{\Lambda_{(n_1, n_2)}}{B_x} + \|(\widehat{G_\# \nu})_{n_2} - G_\# \hat{\nu}_{n_2}\|_{TV}. \end{aligned}$$

Similarly, given that  $\Gamma'_{n_2} = \operatorname{argmin}_{\tau \in \mathcal{P}(\mathcal{Y})} \|\tau - \hat{\nu}_{n_2}\|_{TV}$

$$\|\hat{\nu}_{n_2} - F_\# \hat{\mu}_{n_1}\|_{TV} \leq \|\hat{\nu}_{n_2} - \nu\|_{TV} + \frac{\Lambda'_{(n_1, n_2)}}{B_y} + \|(\widehat{F_\# \mu})_{n_1} - F_\# \hat{\mu}_{n_1}\|_{TV}.$$

□

**Proof of Theorem (4).** Let  $\phi \in \Phi(W, L)_k^d$ , as specified in Theorem (1). Also, let  $\psi \in \Phi(W', L')_d^k$  be a forward translator that achieves consistency. Observe that

$$\begin{aligned}\hat{\mathcal{L}}_{cyc}(\tilde{\mu}_{n_1}, \tilde{\nu}_{n_2}, \psi, \phi) &\leq \|\tilde{\mu}_{n_1} - \mu\|_1 + \|\tilde{\nu}_{n_2} - \nu\|_1 + \mathcal{L}_{cyc}(\mu, \nu, \psi, \phi) \\ &\leq \|\tilde{\mu}_{n_1} - \mu\|_1 + \|\tilde{\nu}_{n_2} - \nu\|_1 + 2\left\{\|\mu - \phi_{\#}\nu\|_1 + \|\nu - \psi_{\#}\mu\|_1\right\}.\end{aligned}\quad (12)$$

For  $1 \leq p, q < \infty$ , we know that

$$\mathbb{E}\left[\|\hat{p}_{\mu, n_1} - p_{\mu}\|_p\right] \lesssim n_1^{-\frac{m_x}{2m_x+d}},$$

[Theorem 6.1 in [13]]. Similarly, for the estimation error in  $\mathcal{Y}$ ,  $\mathbb{E}\left[\|\hat{p}_{\nu, n_2} - p_{\nu}\|_q\right] \lesssim n_2^{-\frac{m_y}{2m_y+k}}$ . Moreover, Theorem (3) implies that

$$\left\{\|p_{\mu} - p_{\phi_{\#}\nu}\|_1\right\}^{\frac{m_x+1}{m_x}} \leq R d_{\mathcal{L}_c^1}(\mu, \phi_{\#}\nu) \leq R \{d_{\mathcal{L}_c^1}(\mu, \hat{\mu}_{n_1}) + d_{\mathcal{L}_c^1}(\hat{\mu}_{n_1}, \phi_{\#}\nu)\}, \quad (13)$$

where  $R = M^{\frac{m_x+1}{m_x}} \left[\|D^{m_x} p_{\mu}\|_p + \|D^{m_x} p_{\phi_{\#}\nu}\|_{p'}\right]^{\frac{1}{m_x}}$ , and  $\hat{\mu}_{n_1}$  is an usual empirical measure corresponding to  $\mu$ . The term  $d_{\mathcal{L}_c^1}(\hat{\mu}_{n_1}, \phi_{\#}\nu)$  can be made arbitrarily small due to the construction of  $\phi$  [Lemma (1)]. Also, we have already seen that  $\mathbb{E}\left[d_{\mathcal{L}_c^1}(\mu, \hat{\mu}_{n_1})\right] \lesssim n_1^{-\frac{1}{d}}$ .

As such,

$$\mathbb{E}\left[\|\tilde{\mu}_{n_1} - \mu\|_1 + 2\|\mu - \phi_{\#}\nu\|_1\right] \leq \mathcal{O}\left(n_1^{-\frac{m_x}{(d\vee 2)m_x+d}}\right),$$

by applying Jensen's inequality to (13). This bound, together with a similar result corresponding to its forward counterpart, will imply

$$\mathbb{E}\left[\hat{\mathcal{L}}_{cyc}(\tilde{\mu}_{n_1}, \tilde{\nu}_{n_2}, \psi, \phi)\right] \lesssim \max\left\{n_1^{-\frac{m_x}{(d\vee 2)m_x+d}}, n_2^{-\frac{m_y}{(k\vee 2)m_y+k}}\right\}.$$

□

**Proof of Corollary (2).** We point out that,  $K(x, y)$  can be taken in particular as  $\tilde{K}(|x - y|)$ , where  $\tilde{K} : \mathbb{R}^d \rightarrow \mathbb{R}$  identically follows the traits of  $K$ . Under such a kernel function,

$$\left\|\mathbb{E}[\hat{p}_{\mu, n_1}] - p_{\mu}\right\|_1 \leq l^* h^{m_x},$$

for some constant  $l^* > 0$  [12]. Now, given an  $\epsilon \leq \frac{2}{3}$ , concentration inequalities on kernel density estimates tell us: there exists constants  $E_1, E_2 > 0$  such that

$$\mathbb{P}\left(\left\|\hat{p}_{\mu, n_1} - \mathbb{E}[\hat{p}_{\mu, n_1}]\right\|_{\infty} > \epsilon\right) \leq E_1 \left(\frac{\sqrt{d}B_x}{h^{d+1}\epsilon}\right)^d \exp(-E_2 n_1 \epsilon^2 h^d).$$

The exact value of  $E_2 = \frac{3}{28\tilde{K}(0)}$  can be obtained based on the convention that  $\tilde{K}(\cdot)$  achieves its modal value at 0. Such a centering can always be done. Hence,

$$\mathbb{P}\left(\left\|\hat{p}_{\mu, n_1} - p_{\mu}\right\|_1 > \epsilon + l^* h^{m_x}\right) \leq E_1 \left(\frac{\sqrt{d}B_x}{h^{d+1}\epsilon}\right)^d \exp(-E_2 n_1 \epsilon^2 h^d). \quad (14)$$

By applying Borel-Cantelli lemma one can show that  $\|\hat{p}_{\mu, n_1} - p_{\mu}\|_1 \rightarrow 0$  almost surely, under suitable choice of  $h \equiv h(n_1, m_x, d)$ . (14) inspires a similar concentration for the estimate  $\hat{p}_{\nu, n_2}$  around  $p_{\nu}$ , under  $L^1$ . As such, by taking the corresponding bandwidth  $h' \equiv h'(n_2, m_y, k)$ , it can also be said that  $\|\hat{p}_{\nu, n_2} - p_{\nu}\|_1 \rightarrow 0$  almost surely. To unify the two processes, one may assess the convergence based on  $n = \min\{n_1, n_2\}$ . Putting these results back in (12), along with (13), we conclude

$$\hat{\mathcal{L}}_{cyc}(\tilde{\mu}_{n_1}, \tilde{\nu}_{n_2}, \psi, \phi) \rightarrow 0, \text{ almost surely.}$$

In other words,  $(\phi \circ \psi)_{\#}\tilde{\mu}_{n_1} \rightarrow \mu$  and  $(\psi \circ \phi)_{\#}\tilde{\nu}_{n_2} \rightarrow \nu$ , both in total variation. □

## Identity loss

Let us first rewrite the identity loss in terms of the underlying measures. Based on the notations in our framework,

$$\mathcal{L}_{id}(\mu, \nu, F, G) = \|\mu - F_{\#}\mu\|_1 + \|\nu - G_{\#}\nu\|_1.$$

Observe that the distributions must be equivariate to conform to this loss. Moreover,

$$\|\mu - \nu\|_1 - \|F_{\#}\mu - \nu\|_1 \leq \|\mu - F_{\#}\mu\|_1. \quad (15)$$

If the forward translated law  $F_{\#}\mu$  is Sobolev-smooth of order  $m_y$  (Assumption 2), Theorem (3) asserts the existence of a constant  $R' > 0$  such that  $\|p_{\nu} - p_{F_{\#}\mu}\|_1 \leq R' [d_{\mathcal{L}^1}(\nu, F_{\#}\mu)]^{\frac{m_y}{m_y+1}}$ . In case  $F$  is also translation consistent, the second term on the left-hand side of (15) vanishes. A similar conclusion can be drawn for the quantity  $\|\nu - G_{\#}\nu\|_1$  as well. As such, the cumulative identity loss from both domains cannot be minimized beyond the intrinsic discrepancy between the input distributions.

## References

- [1] Jonathan Weed and Francis Bach. Sharp asymptotic and finite-sample rates of convergence of empirical measures in Wasserstein distance. *Bernoulli*, 25(4A):2620 – 2648, 2019.
- [2] Alexander G. de G. Matthews, Jiri Hron, Mark Rowland, Richard E. Turner, and Zoubin Ghahramani. Gaussian process behaviour in wide deep neural networks. In *International Conference on Learning Representations*, 2018.
- [3] Cédric Villani. *Optimal transport : old and new*. Grundlehren der mathematischen Wissenschaften. Springer, 2009.
- [4] Nicolas Schreuder. Bounding the expectation of the supremum of empirical processes indexed by hölder classes, 2020, *arXiv preprint arXiv:2003.13530*.
- [5] Nicolas Schreuder, Victor-Emmanuel Brunel, and Arnak Dalalyan. Statistical guarantees for generative models without domination. In *Proceedings of the 32nd International Conference on Algorithmic Learning Theory*, pages 1051–1071, 2021.
- [6] Jian Huang, Yuling Jiao, Zhen Li, Shiao Liu, Yang Wang, and Yunfei Yang. An error analysis of generative adversarial networks for learning distributions, 2021, *arXiv preprint arXiv:2105.13010*.
- [7] Hassan Ashtiani and Abbas Mehrabian. Some techniques in density estimation, 2018, *arXiv preprint arXiv:1801.04003*.
- [8] Alison L. Gibbs and Francis Edward Su. On choosing and bounding probability metrics. *International Statistical Review*, 70(3):419–435, 2002.
- [9] Anish Chakrabarty and Swagatam Das. Statistical regeneration guarantees of the wasserstein autoencoder with latent space consistency. In *Advances in Neural Information Processing Systems*, 2021.
- [10] Luc Devroye and Gábor Lugosi. *Combinatorial methods in density estimation*. Springer series in statistics, 2001.
- [11] Bharath K. Sriperumbudur, Kenji Fukumizu, Arthur Gretton, Bernhard Schölkopf, and Gert R. G. Lanckriet. On the empirical estimation of integral probability metrics. *Electronic Journal of Statistics*, 6:1550 – 1599, 2012.
- [12] Evarist Giné and Richard Nickl. *Mathematical Foundations of Infinite-Dimensional Statistical Models*. Cambridge Series in Statistical and Probabilistic Mathematics. Cambridge University Press, 2015.
- [13] Galatia Cleanthous, Athanasios G. Georgiadis, and Emilio Porcu. Minimax density estimation on sobolev spaces with dominating mixed smoothness, 2019, *arXiv preprint arXiv:1906.06835*.
